# Supplementary material for: Differentiating Urgent and Emergent Causes of Acute Red Eye for the Emergency Physician
Source: PubMed Central journal article supplement (PMC5391903; doi:10.5811/westjem.2016.12.31798), 2017-03-03
Supplement: wjem-18-509-s001.pdf [file wjem-18-509-s001.pdf]

Table 1: The differential diagnosis for the acute red eye in the emergency department

| Condition                                                                                                                                                                | Definition                                                                                                                             | Risk factors and demographics                                                                                                                                                                                                                                                                                                                                                        | Associated symptoms                                                           | Pain? Photophobia? Proparacaine use? Phenylephrine use?                                                                                                                                                                                                                                             | Redness is focal or diffuse?                                                                                                                   | Treatment? Ophthalmology referral (urgent vs. emergent)?                                                                                                                                | Anterior chamber (AC)? Pupils? Visual acuity (VA)? Fluorescein?                                                                                                                                                                                                    | Additional Notes                                                                                                                                                                                                                                                                                        |
|--------------------------------------------------------------------------------------------------------------------------------------------------------------------------|----------------------------------------------------------------------------------------------------------------------------------------|--------------------------------------------------------------------------------------------------------------------------------------------------------------------------------------------------------------------------------------------------------------------------------------------------------------------------------------------------------------------------------------|-------------------------------------------------------------------------------|-----------------------------------------------------------------------------------------------------------------------------------------------------------------------------------------------------------------------------------------------------------------------------------------------------|------------------------------------------------------------------------------------------------------------------------------------------------|-----------------------------------------------------------------------------------------------------------------------------------------------------------------------------------------|--------------------------------------------------------------------------------------------------------------------------------------------------------------------------------------------------------------------------------------------------------------------|---------------------------------------------------------------------------------------------------------------------------------------------------------------------------------------------------------------------------------------------------------------------------------------------------------|
| <b>Subconjunctival Hemorrhage</b><br> <p>Image courtesy of Andrew Pearson, MA, MRCP</p> | Heme under the conjunctiva, secondary to ruptured conjunctival blood vessel, which may be caused by coughing or straining <sup>7</sup> | Trauma, straining (coughing, sneezing, vomiting, Valsalva), conjunctivitis, chronic health conditions (diabetes, hypertension, coagulopathy) <sup>8</sup>                                                                                                                                                                                                                            | None                                                                          | Pain: No<br>Photophobia: No<br>Proparacaine: N/A<br>Phenylephrine: No improvement of redness                                                                                                                                                                                                        | Usually focal (in one sector) but may spread before it resolves                                                                                | Treatment:<br>-Supportive care / topical lubrication<br><br>Referral: Primary care follow up as needed                                                                                  | AC: Clear<br><br>Pupils: Normal<br><br>VA: Normal<br><br>Fluorescein: No uptake                                                                                                                                                                                    | One should have high suspicion for globe rupture if there is trauma and/or diffuse or 360-degree bullous hemorrhage                                                                                                                                                                                     |
| <b>Conjunctivitis</b><br> <p>Image courtesy of Wikimedia Creative Commons</p>           | Infectious or non-infectious inflammation of the bulbar and palpebral conjunctiva <sup>1</sup>                                         | Exposure to adenovirus or enterovirus, Staphylococcus aureus, Streptococcus pneumoniae, Haemophilus influenzae, Neisseria gonorrhoea, Chlamydia trachomatis, Diphtheria, or history of allergy                                                                                                                                                                                       | Tearing, discharge, or associate viral symptoms                               | Pain: May have a mild burning sensation<br><br>Photophobia: No<br><br>Proparacaine: Improvement in irritation<br><br>Phenylephrine: Can have mild improvement of redness                                                                                                                            | Usually diffuse<br><br>Tarsal/palpebral conjunctiva SHOULD be involved in the redness                                                          | Treatment: Artificial tears 4-8x per day, consider topical antibiotics<br><br>Referral: Primary care follow up as needed                                                                | AC: Clear<br><br>Pupils: Normal<br><br>VA: Normal<br><br>Fluorescein: No uptake                                                                                                                                                                                    | Patients should not have photophobia (this should raise suspicion for a more serious condition)<br>Patients will commonly have discharge.<br><br>Viral conjunctivitis is highly contagious 1-2 weeks from onset. Recommend contact precautions and sterilization of patient encounter room after visit. |
| <b>Episcleritis</b><br> <p>Image courtesy of: Asagan, Wikimedia Creative Commons</p>   | Inflammation of the episclera, which is the vascularized tissue between conjunctiva and sclera) <sup>2</sup>                           | -70% female <sup>2</sup><br>-Fifth decade of life <sup>2</sup><br><br>-One-third related to systemic autoimmune conditions <sup>2</sup>                                                                                                                                                                                                                                              | Ocular redness without irritation or slight tenderness                        | Pain: Usually mild irritation, but chronic or nodular can have pain <sup>2</sup><br><br>Photophobia: No<br><br>Proparacaine: May have improvement of irritation<br><br>Phenylephrine: Resolution of episcleral redness after 10-15 minutes                                                          | Most commonly focal in interpalpebral zone, can be diffuse                                                                                     | Treatment:<br>-Topical lubricants <sup>15</sup><br>-Oral non-steroidal anti-inflammatory drugs<br>-Return precautions for symptoms of scleritis<br><br>Referral: Primary care follow up | AC: Clear<br><br>Pupils: Normal<br><br>VA: Normal<br><br>Fluorescein: No uptake                                                                                                                                                                                    | Most are idiopathic<br><br>Inflamed vessels can be moved with cotton tipped applicator                                                                                                                                                                                                                  |
| <b>Anterior Scleritis</b><br> <p>Image courtesy of Marc Yonkers, MD, PhD</p>          | Scleral inflammation, frequently associated with autoimmune systemic diseases <sup>2</sup>                                             | 50% autoimmune, systemic disease (rheumatoid arthritis, Wegener's granulomatosis), 4-10% infectious (Borrelia burgdorferi, tuberculosis, Nocardia asteroides, pseudomonas aeruginosa, Serratia marcescens, staphylococcus, streptococcus, syphilis, varicella zoster virus, CMV, aspergillus flavus, pseudallescheria boydii, protozoa acanthamoeba, toxoplasma gondii) <sup>2</sup> | Gradual onset, severe boring pain                                             | Pain: Severe boring / piercing pain is typically worse at night and with extraocular movements, and may radiate to the face. <sup>2,16</sup><br><br>Photophobia: Possible<br><br>Proparacaine: No improvement<br><br>Phenylephrine: No improvement in scleral redness (episclera may still improve) | May be diffuse or localized, depending on the type, sclera may have a typical bluish hue (visualizing uvea under thinned sclera) <sup>17</sup> | Treatment: Systemic treatment with NSAIDs or immunosuppressive therapy. <sup>17</sup> Eye shield if there is a perforation risk.<br><br>Referral: Emergent <sup>8</sup>                 | AC: Many will have associated anterior uveitis <sup>2</sup><br><br>Pupils: Normal<br><br>VA: Normal or decreased, depending on the extent of disease<br><br>Fluorescein: Occasionally will have peripheral keratitis, more common in necrotizing form <sup>2</sup> | There are three forms of anterior scleritis: diffuse, nodular, and necrotizing. <sup>2</sup> Necrotizing scleritis usually causes the most severe pain and the worst outcome.<br><br>Inflamed vessels cannot be moved with cotton tipped applicator                                                     |
| <b>Anterior Uveitis/Iritis</b>                                                                                                                                           | Inflammation of the uvea (iris, choroid, and ciliary body), causing redness and pain.                                                  | Idiopathic, systemic diseases (spondyloarthropathies), infectious (syphilis, tuberculosis, Lyme disease, toxoplasmosis, herpesviruses,                                                                                                                                                                                                                                               | Pain, redness, photophobia, consensual photophobia, tearing, decreased vision | Pain: Yes<br><br>Photophobia: Yes<br><br>Proparacaine: No                                                                                                                                                                                                                                           | Diffuse, pronounced at the limbus (ciliary flush)                                                                                              | Treatment:<br>-Topical steroids, dilating drops (to prevent scarring of iris to lens); do not start steroids without ophthalmology                                                      | AC: Cells and flare<br><br>Pupil: Constricted or irregular pupil                                                                                                                                                                                                   | -If a specific diagnosis is suspected can start workup and treat underlying condition                                                                                                                                                                                                                   |

|                                                                                                                                                                                                                      |                                                                                                                                                    |                                                                                                                                                                                                                                                                            |                                                                                      |                                                                                                                                                                                                    |                                                   |                                                                                                                                                                                                                                                                                                                                                                                                                                                                                                                                                                                                                                                                                                                               |                                                                                                                                                                                                                                             |                                                                                              |
|----------------------------------------------------------------------------------------------------------------------------------------------------------------------------------------------------------------------|----------------------------------------------------------------------------------------------------------------------------------------------------|----------------------------------------------------------------------------------------------------------------------------------------------------------------------------------------------------------------------------------------------------------------------------|--------------------------------------------------------------------------------------|----------------------------------------------------------------------------------------------------------------------------------------------------------------------------------------------------|---------------------------------------------------|-------------------------------------------------------------------------------------------------------------------------------------------------------------------------------------------------------------------------------------------------------------------------------------------------------------------------------------------------------------------------------------------------------------------------------------------------------------------------------------------------------------------------------------------------------------------------------------------------------------------------------------------------------------------------------------------------------------------------------|---------------------------------------------------------------------------------------------------------------------------------------------------------------------------------------------------------------------------------------------|----------------------------------------------------------------------------------------------|
| 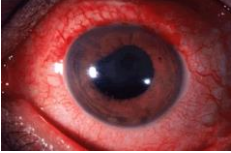 <p>Image courtesy of Jonathan Trove, MD, Wikimedia Creative Commons</p>                                                             |                                                                                                                                                    | <p>cytomegalovirus), drug induced (rifabutin, cidofovir, sulfas, moxifloxacin)<sup>11</sup></p>                                                                                                                                                                            |                                                                                      | <p>improvement</p> <p>Phenylephrine: No improvement in redness</p>                                                                                                                                 |                                                   | <p>consultation.</p> <p>Referral: Urgent (within 24 hours)</p>                                                                                                                                                                                                                                                                                                                                                                                                                                                                                                                                                                                                                                                                | <p>VA: Normal or decreased</p> <p>Fluorescein: +/- (dendrites if HSV underlying cause)</p>                                                                                                                                                  |                                                                                              |
| <p><b>Acute Angle Closure Glaucoma</b></p>  <p>Image courtesy of Jonathan Trove, MD, Wikimedia Creative Commons</p>                 | <p>Closure (or narrowing) of the anterior chamber angle, causing elevated intraocular pressure and eventual optic nerve damage.<sup>4,18</sup></p> | <p>-Increasing age<br/>-Female gender (Three times more common)<br/>-Asian ethnicity<br/>-Shallow anterior chamber<br/>-Hyperopia (farsightedness / "plus" glasses prescription), medication induced (topiramate or sulfa)<sup>18</sup></p>                                | <p>Headache, nausea, vomiting, halos around lights, photophobia, blurred vision.</p> | <p>Pain: Yes, often with headache, nausea, and vomiting</p> <p>Photophobia: Yes</p> <p>Propranolol: no improvement</p> <p>Phenylephrine: should be avoided, may exacerbate attack<sup>14</sup></p> | <p>Diffuse, with characteristic ciliary flush</p> | <p>Treatment:<br/>Lower IOP in preparation for definitive treatment by ophthalmology (usually laser iridotomy)</p> <p>IOP medications:<br/>-Topical parasympathomimetics (pilocarpine 2%; avoid anything higher than 2%)<br/><br/>-Topical beta-blocker (0.5% timolol) (caution in asthmatics, COPD patients, and patients with heart block)<br/><br/>-Carbonic anhydrase inhibitors (acetazolamide 500mg IV) (Avoid in sickle cell patients and possibly in sulf- allergic patients)<br/><br/>-Alpha agonists (brimonidine 0.1%) (Avoid use in patients on monoamine oxidase inhibitors) (Avoid apraclonidine as it can dilate and cause iris ischemia – has more alpha-1 adrenergic activity)</p> <p>Referral: Emergent</p> | <p>AC: Shallow</p> <p>Pupil: mid-sized or dilated, non-reactive pupil<sup>14</sup></p> <p>VA: Decreased</p> <p>Fluorescein: No uptake</p>                                                                                                   | <p>Elevated IOP, can be &gt; 60 mm Hg</p> <p>Can have permanent vision loss within hours</p> |
| <p><b>Corneal Abrasions/<br/>Corneal Foreign Bodies</b></p>  <p>Image courtesy of James Heilman, MD Wikimedia Creative Commons</p> | <p>Defect (or foreign body) of the corneal epithelium, causing irritation, pain, tearing, and photophobia<sup>3</sup></p>                          | <p>-History of trauma, contact lens use, male gender, young adults, construction or manufacturing job without eye protection (foreign body)</p>                                                                                                                            | <p>-Photophobia, watering, tearing, foreign body sensation</p>                       | <p>Pain: Yes, usually lasting less than 24- 48 hours<sup>3</sup></p> <p>Photophobia: Yes</p> <p>Propranolol: Improves symptoms</p> <p>Phenylephrine: Redness improves</p>                          | <p>Diffuse</p>                                    | <p>Treatment:<br/>Corneal abrasion:<br/>-Lid eversion to exclude foreign body<br/>-Lubricating ointment or drops<br/>-Topical antibiotics (polymixin B/trimethoprim or polysporin; quinolones for contact lens wearers)</p> <p>Corneal foreign body:<br/>-Removal by ophthalmology or ED physician, depending on location, size, and presence of rust ring<br/>-Topical antibiotics</p> <p>Referral: Contact lens wearers: urgent (however, emergent if concern for corneal ulcer– presence of ulcer or hypopyon, pain not improving within 24 hours)</p>                                                                                                                                                                     | <p>AC: Clear</p> <p>Pupil: Normal</p> <p>VA: May be decreased if the abrasion/FB is in the visual axis, however, this should raise concern for alternative diagnosis</p> <p>Fluorescein: Uptake at the corneal abrasion or foreign body</p> |                                                                                              |
| <p><b>Bacterial or Fungal Keratitis/Corneal Ulcer</b></p>                                                                                                                                                            | <p>Corneal epithelial defect with stromal haze due to microorganisms<sup>5</sup></p>                                                               | <p>-Contact lens use<sup>19</sup><br/>-Agricultural work<sup>10</sup><br/>-Eye trauma<br/>-Use of corticosteroids<br/>-Systemic diseases (diabetes)<br/>-Prior ocular surgery<br/>-Chronic ocular surface disease<sup>10</sup><br/><br/>-Microorganisms (Streptococcus</p> | <p>Significant pain, tearing, and discharge</p>                                      | <p>Pain: Yes</p> <p>Photophobia: Yes</p> <p>Propranolol: May improve pain</p> <p>Phenylephrine: May improve redness</p>                                                                            | <p>Diffuse</p>                                    | <p>Treatment: Fortified topical antibiotics</p> <p>Referral: Emergent</p>                                                                                                                                                                                                                                                                                                                                                                                                                                                                                                                                                                                                                                                     | <p>AC: Possible cells and flare</p> <p>Pupil: Normal</p> <p>VA: Decreased if involving visual axis</p> <p>Fluorescein: Large uptake over area of ulceration</p>                                                                             |                                                                                              |

|                                                                                                                                                                   |                                                                                                                                                                                                         |                                                                                                                                                                                                                                                                                                                                                                                                                                                                                                                                                                             |                                                                                                                                                                                                       |                                                                                                                                                |                                    |                                                                                                                                                                                                                                                                                               |                                                                                                                                                                                                                                                                             |                                                                             |
|-------------------------------------------------------------------------------------------------------------------------------------------------------------------|---------------------------------------------------------------------------------------------------------------------------------------------------------------------------------------------------------|-----------------------------------------------------------------------------------------------------------------------------------------------------------------------------------------------------------------------------------------------------------------------------------------------------------------------------------------------------------------------------------------------------------------------------------------------------------------------------------------------------------------------------------------------------------------------------|-------------------------------------------------------------------------------------------------------------------------------------------------------------------------------------------------------|------------------------------------------------------------------------------------------------------------------------------------------------|------------------------------------|-----------------------------------------------------------------------------------------------------------------------------------------------------------------------------------------------------------------------------------------------------------------------------------------------|-----------------------------------------------------------------------------------------------------------------------------------------------------------------------------------------------------------------------------------------------------------------------------|-----------------------------------------------------------------------------|
|  <p>Image courtesy of Andrew Pearson, MA, MRCP</p>                                |                                                                                                                                                                                                         | <p>pneumoniae, staphylococcus aureus, mycobacterium fortuitum, M. chelonae, Nocardia spp., Pseudomonas aeruginosa, Enterobacteriaceae, Moraxella, Haemophilus, Neisseria gonorrhoeae; fungi: Fusarium, Aspergillus, Curvularia, Candida, Cryptococcus; protozoa: Acanthamoeba)</p>                                                                                                                                                                                                                                                                                          |                                                                                                                                                                                                       |                                                                                                                                                |                                    |                                                                                                                                                                                                                                                                                               |                                                                                                                                                                                                                                                                             |                                                                             |
| <p><b>Endophthalmitis</b></p>  <p>Image courtesy of Marc Yonkers, MD, PhD</p>    | <p>Bacterial or fungal) infection involving the vitreous and/or aqueous humor<sup>9</sup></p>                                                                                                           | <p>-Eye surgery (cataract surgery has 0.1% risk)<br/>         -Penetrating ocular trauma<br/>         -Corneal infection<br/>         -Intravitreal injections<br/>         -(Fungal) hospitalization with central venous access, total parenteral nutrition, or broad spectrum antibiotics<sup>9</sup></p> <p>Microorganisms:<br/>         Coagulase-negative staphylococcus, viridans strep (post-procedure), Bacillus cereus (post-traumatic), staphylococcus, streptococcus, candida (endogenous), klebsiella pneumoniae (East Asia, associated with liver abscess)</p> | <p>Pain and decreased vision</p>                                                                                                                                                                      | <p>Pain: Yes<br/>         Photophobia: Yes<br/>         Proparacaine: No improvement<br/>         Phenylephrine: May have some improvement</p> | <p>Diffuse</p>                     | <p>Treatment:<br/>         -If vision “hand motion” or better, then intravitreal injection of antibiotics<br/>         -If vision “light perception” or worse, then surgery<br/>         Referral: Emergent</p>                                                                               | <p>AC: Commonly associated with hypopyon<sup>9</sup><br/>         Visual acuity: Decreased<br/>         Pupils: Severe cases may have afferent pupillary defect<sup>20</sup><br/>         Fluorescein: May diagnose the inciting penetrating injury or corneal abrasion</p> | <p>Usually occurs 2-7 days post-operatively or 12-24 hours after trauma</p> |
| <p><b>Viral Keratitis</b></p>  <p>Image courtesy of Andrew Pearson, MA, MRCP</p> | <p>Corneal inflammation caused by herpes simplex, varicella zoster, or adenovirus (epidemic keratoconjunctivitis, EKC) characterized by pain, tearing, photophobia, and corneal epithelial defects.</p> | <p>-HSV-1 (most commonly), HSV-2, varicella zoster virus., adenovirus 8, 19, 37<sup>21</sup></p>                                                                                                                                                                                                                                                                                                                                                                                                                                                                            | <p>VZV: Hutchinson’s sign (vesicular lesion on the nose, VZV), although this is not sensitive or specific<sup>22</sup><br/>         HSV: vesicular rash. Can have high IOP in HSV induced uveitis</p> | <p>Pain: Yes<br/>         Photophobia: Yes<br/>         Proparacaine: Improvement in pain<br/>         Phenylephrine: May improve redness</p>  | <p>Diffuse, with ciliary flush</p> | <p>Treatment:<br/>         -Topical (trifluridine 1% q2h) and/or oral anti-virals (acyclovir, valacyclovir)<br/>         -Topical steroids may be added in treatment of VZV ophthalmicus, but this should ONLY be done in consultation with ophthalmology<br/>         Referral: Emergent</p> | <p>AC: Possible cells and flare<br/>         VA: Normal or decreased<br/>         Pupils: Normal<br/>         Fluorescein: HSV: branching pattern with terminal bulbs; VZV: branching with tapered ends; EKC: diffuse fine keratitis</p>                                    |                                                                             |
